# Supplementary material for: Relationship between Serum Cortisol, Dehydroepiandrosterone Sulfate (DHEAS) Levels, and Natural Killer Cell Activity: A Cross-Sectional Study
Source: MDPI journal article supplement (doi:10.3390/jcm12124027), 2023-06-13
Supplement: s1 [file s1]

**Table S1.** Differences in NKA levels according to cortisol, DHEAS, and CDR quartiles

| Men              |                                | Premenopausal women |                  | Postmenopausal women           |                 |                                |       |
|------------------|--------------------------------|---------------------|------------------|--------------------------------|-----------------|--------------------------------|-------|
|                  | NKA (pg/mL)                    | <i>p</i>            |                  | NKA (pg/mL)                    | <i>p</i>        |                                |       |
| Cortisol         |                                | 0.003               | Cortisol         |                                | <0.001          |                                |       |
| Q1 (≤ 6.9)       | 1233.5 ± 998.7 <sup>d</sup>    |                     | Q1 (≤ 5.6)       | 1269.4 ± 1081.1 <sup>d</sup>   | Q1 (≤ 5.6)      | 1332.8 ± 1017.4 <sup>d</sup>   |       |
| Q2 (7.0-9.1)     | 1280.4 ± 1017.0 <sup>d</sup>   |                     | Q2 (5.7-7.4)     | 1351.3 ± 1026.0 <sup>d</sup>   | Q2 (5.7-7.3)    | 1377.8 ± 1032.8 <sup>c,d</sup> |       |
| Q3 (9.2-12.1)    | 1203.1 ± 1019.7 <sup>d</sup>   |                     | Q3 (7.5-10.2)    | 1147.1 ± 1029.2 <sup>d</sup>   | Q3 (7.4-9.8)    | 1029.5 ± 845.2 <sup>b</sup>    |       |
| Q4 (≥ 12.2)      | 950.3 ± 924.5 <sup>a,b,c</sup> |                     | Q4 (≥ 10.3)      | 848.4 ± 812.3 <sup>a,b,c</sup> | Q4 (≥ 9.9)      | 930.0 ± 864.3 <sup>a,b</sup>   |       |
| DHEAS            |                                | 0.264               | DHEAS            |                                | 0.676           | DHEAS                          | 0.910 |
| Q1 (≤ 129.6)     | 1054.3 ± 969.6                 |                     | Q1 (≤ 110.9)     | 1120.2 ± 1078.9                | Q1 (≤ 55.5)     | 1178.3 ± 919.9                 |       |
| Q2 (129.7-196.3) | 1222.7 ± 1070.1                |                     | Q2 (111.0-157.8) | 1122.5 ± 976.5                 | Q2 (55.6-88.6)  | 1131.8 ± 902.3                 |       |
| Q3 (196.4-274.8) | 1222.0 ± 1019.8                |                     | Q3 (157.9-221.5) | 1221.8 ± 1032.7                | Q3 (88.7-129.7) | 1149.9 ± 920.0                 |       |
| Q4 (≥ 274.9)     | 1173.8 ± 922.0                 |                     | Q4 (≥ 221.6)     | 1154.3 ± 947.9                 | Q4 (≥ 129.8)    | 1215.0 ± 1098.6                |       |
| CDR              |                                | 0.026               | CDR              |                                | <0.001          | CDR                            | 0.007 |
| Q1 (≤ 3.0)       | 1277.1 ± 992.5 <sup>d</sup>    |                     | Q1 (≤ 3.1)       | 1285.2 ± 1047.4 <sup>d</sup>   | Q1 (≤ 5.6)      | 1363.2 ± 1088.6 <sup>d</sup>   |       |
| Q2 (3.1-4.8)     | 1217.8 ± 1005.1                |                     | Q2 (3.2-4.6)     | 1269.8 ± 987.6 <sup>d</sup>    | Q2 (5.7-8.7)    | 1217.8 ± 929.7                 |       |

|              |                            |              |                              |               |                            |
|--------------|----------------------------|--------------|------------------------------|---------------|----------------------------|
| Q3 (4.9-7.4) | 1180.8 ± 1021.5            | Q3 (4.7-7.6) | 1145.9 ± 1028.2              | Q3 (8.8-14.3) | 1145.1 ± 974.3             |
| Q4 (≥ 7.5)   | 997.2 ± 955.2 <sup>a</sup> | Q4 (≥ 7.7)   | 918.0 ± 934.1 <sup>a,b</sup> | Q4 (≥ 14.4)   | 948.6 ± 791.7 <sup>a</sup> |

---

Data are expressed as mean ± SD. *p*-values were calculated using analysis of variance (ANOVA).

<sup>a</sup>*p*-value <0.05 vs. Q1 group based on the Tukey's Honest Significant Difference test.

<sup>b</sup>*p*-value <0.05 vs. Q2 group based on the Tukey's Honest Significant Difference test.

<sup>c</sup>*p*-value <0.05 vs. Q3 group based on the Tukey's Honest Significant Difference test.

<sup>d</sup>*p*-value <0.05 vs. Q4 group based on the Tukey's Honest Significant Difference test.

Abbreviations: CDR, cortisol/DHEAS ratio; DHEAS, dehydroepiandrosterone sulfate; NKA, natural killer cell activity.

**Table S2.** Correlation coefficients (*r*) between NKA and other variables including cortisol, DHEAS, and CDR

|           | Men      |          | Premenopausal<br>women |          | Postmenopausal<br>women |          |
|-----------|----------|----------|------------------------|----------|-------------------------|----------|
|           | <i>r</i> | <i>p</i> | <i>r</i>               | <i>p</i> | <i>r</i>                | <i>p</i> |
| Age       | -0.055   | 0.110    | -0.057                 | 0.084    | -0.054                  | 0.228    |
| WBC count | -0.174   | <0.001   | -0.189                 | <0.001   | -0.142                  | 0.001    |
| NLR       | -0.284   | <0.001   | -0.209                 | <0.001   | -0.302                  | <0.001   |
| CRP       | -0.035   | 0.332    | -0.076                 | 0.035    | -0.095                  | 0.043    |
| Cortisol  | -0.132   | <0.001   | -0.185                 | <0.001   | -0.192                  | <0.001   |
| DHEAS     | 0.008    | 0.815    | 0.017                  | 0.597    | 0.038                   | 0.399    |
| CDR       | -0.063   | 0.067    | -0.108                 | 0.001    | -0.079                  | 0.077    |

*r* is correlation coefficient, and *p*-values were calculated using Pearson's correlation analysis. Abbreviations: CDR, cortisol/DHEAS ratio; CRP, C-reactive protein; DHEAS, dehydroepiandrosterone sulfate; NLR, neutrophil/lymphocyte ratio; WBC, white blood cell.
